# Supplementary material for: The Use of Wheat Starch as Gelling Agent for In Vitro Proliferation of Blackberry (Rubus fruticosus L.) Cultivars and the Evaluation of Genetic Fidelity after Repeated Subcultures
Source: MDPI journal article supplement (doi:10.3390/horticulturae9080902), 2023-08-08
Supplement: s1 [file s1]

Table S1. Sequences of SCoT primers and SRAP primer combinations used in this study

| SCoT primer name             | Primer sequences (5'-3')                                |
|------------------------------|---------------------------------------------------------|
| SCoT-1                       | CAACAATGGCTACCACCA                                      |
| SCoT-2                       | CAATGGCTACCACTAGCC                                      |
| SCoT-3                       | CAACAATGGCTACCACCG                                      |
| SCoT-4                       | CAACAATGGCTACCACCT                                      |
| SCoT-5                       | CAACAATGGCTACCACGA                                      |
| SCoT-6                       | CAACAATGGCTACCACGC                                      |
| SCoT-9                       | CAACAATGGCTACCAGCA                                      |
| SCoT-11                      | AAGCAATGGCTACCACCA                                      |
| SCoT-12                      | ACGACATGGCGACCAACG                                      |
| SRAP primer combination name | Primer sequences (5'-3')                                |
| Em4-Me6                      | F: GAC TGC GTA CGA ATT TGA<br>R: TGA GTC CAA ACC GGA CA |
| Em7-Me1                      | F: GAC TGC GTA CGA ATT CAA<br>R: TGA GTC CAA ACC GGA TA |
| Em3-Me8                      | F: GAC TGC GTA CGA ATT GAC<br>R: TGA GTC CAA ACC GGA CT |
| Em5-Me4                      | F: GAC TGC GTA CGA ATT AAC<br>R: TGA GTC CAA ACC GGA CC |
| Em2-Me8                      | F: GAC TGC GTA CGA ATT TGC<br>R: TGA GTC CAA ACC GGA CT |
| Em8-Me5                      | F: GAC TGC GTA CGA ATT CAC<br>R: TGA GTC CAA ACC GGA AG |
| Em1-Me7                      | F: GAC TGC GTA CGA ATT AAT<br>R: TGA GTC CAA ACC GGA CG |
| Em6-Me3                      | F: GAC TGC GTA CGA ATT GCA<br>R: TGA GTC CAA ACC GGA AT |
| Em1-Me8                      | F: GAC TGC GTA CGA ATT AAT<br>R: TGA GTC CAA ACC GGA CT |
| Em2-Me6                      | F: GAC TGC GTA CGA ATT TGC<br>R: TGA GTC CAA ACC GGA CA |
